# Supplementary material
Source: ML conference proceedings conference paper supplement (https://openreview.net/forum?id=WpXq5n8yLb)

float16 greedy  
beam shape=(1,5) 29.307 tokens/sec speedup=1.373

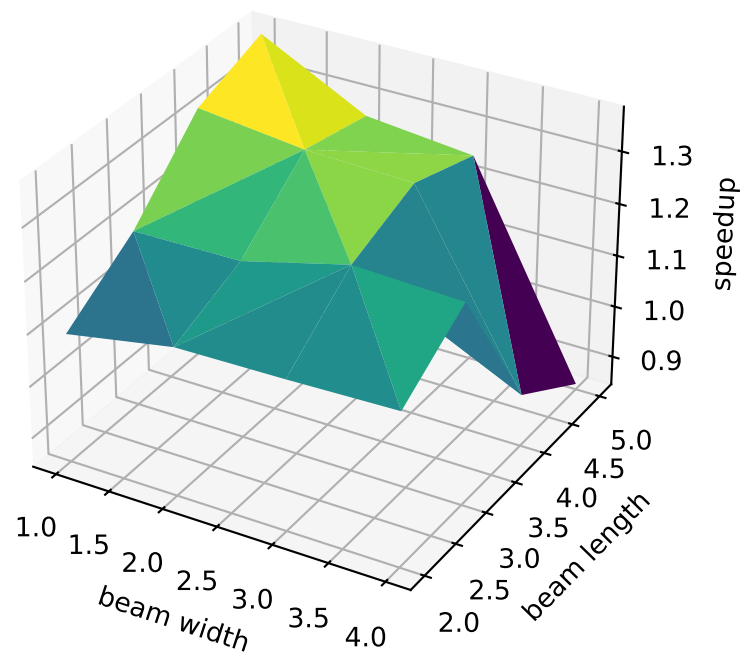

float16 non-greedy  
beam shape=(3,5) 28.699 tokens/sec speedup=1.345

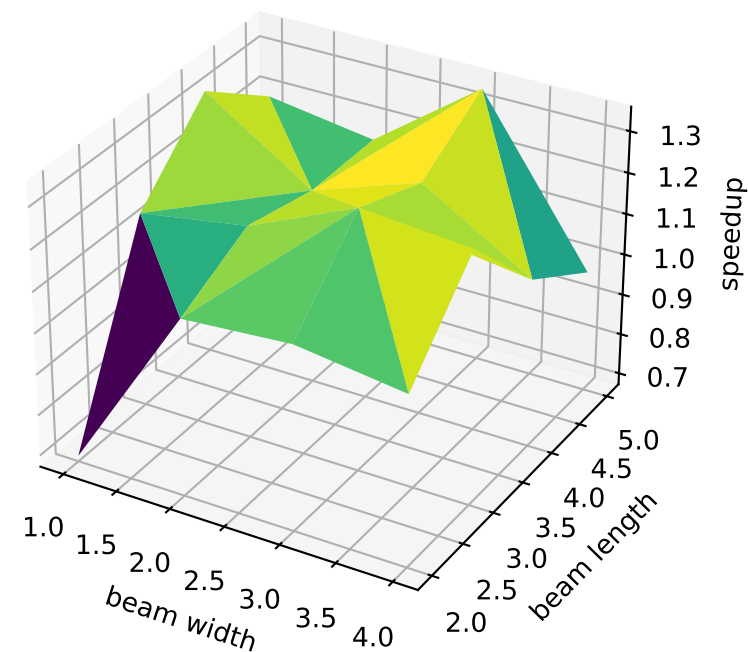

bfloat16 greedy  
beam shape=(3,4) 27.723 tokens/sec speedup=1.343

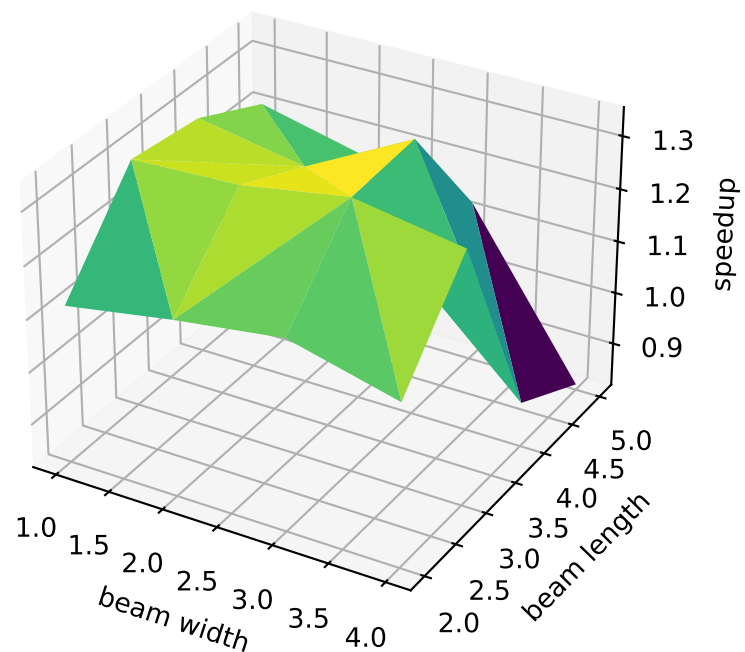

bfloat16 non-greedy  
beam shape=(4,3) 29.440 tokens/sec speedup=1.426

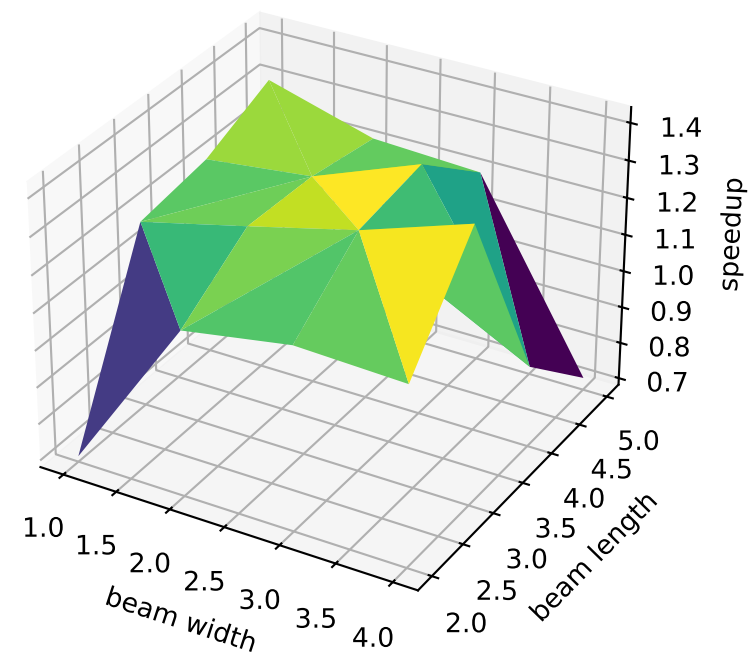

Supplement: supplementary_material [file attachment]
